# Supplementary material for: Ischemic Stroke and Its Risk Factors in a Registry-Based Large Cross-Sectional Diabetic Cohort in a Country Facing a Diabetes Epidemic
Source: Hindawi journal article supplement (doi:10.1155/2016/4132589), 2016-01-01
Supplement: f1 [file 4132589.f1.pdf]

**Supplementary Table 1:** Multivariate – adjusted\* odds ratio and 95% confidence intervals of risk factors in the studied cohort:

| <b>Risk factors</b>         | <b>OR</b> | <b>95% CI</b> | <b>p-value</b> |
|-----------------------------|-----------|---------------|----------------|
| Hypertension                | 4.93      | 3.67-6.61     | <0.0001        |
| Peripheral vascular disease | 1.36      | 0.18-10.15    | 0.762          |
| Coronary heart disease      | 2.48      | 1.92-3.20     | <0.0001        |
| Nephropathy                 | 1.94      | 1.52-2.48     | <0.0001        |
| Insulin use                 | 1.97      | 1.57-2.48     | <0.0001        |
| Hyperlipidemia              | 1.61      | 1.29-2.01     | <0.0001        |
| Retinopathy                 | 1.47      | 1.15-1.87     | 0.002          |
| Peripheral Neuropathy       | 0.99      | 0.58-1.71     | 0.996          |

\* Adjusted for age , gender , smoking , DM Duration, and obesity
